# Supplementary material for: Molecular Characterization of Host-Specific Biofilm Formation in a Vertebrate Gut Symbiont
Source: PLoS Genet. 2013 Dec 26;9(12):e1004057. doi: 10.1371/journal.pgen.1004057 (PMC3873254; doi:10.1371/journal.pgen.1004057)
Supplement: Table S2 — Proteomics of cell wall and secreted proteins from L. reuteri 100-23C wild type and secA2 mutant in vitro using Scaffold 4 analysis of MASCOT MS data: total spectrum count displayed for each protein. (XLS) [file pgen.1004057.s004.xls]

## Sheet: Samples table
Scaffold 4 analysis of cell surface and secreted proteins from L. reuteri 100-23C wild type and secA2 mutant strains: total spectrum count displayed for each protein
	Bio view: 39 proteins in 38 clusters with 23 filtered out			secA2 mutant cell surface extract samplesa						WT cell surface extract samplesa					secA2 mutant spent media samples													WT spent media samples
	(99.9% protein threshold; 2 minimum peptides; 99.9% peptide threshold)	Accession	Full-length	60-80 kDab	80-100 kDa	100-200 kDa	200-350 kDa	350-800 kDa	>800 kDa	60-80 kDa	80-200 kDa	200-350 kDa	350-800 kDa	>800 kDa	100-150 kDa	112 kDa	112 kDac	115 kDa	115 kDac	450 kDa	450 kDac	500 kDa	500 kDac	650 kDa	650 kDac	>700 kDa	>700 kDac	100-150 kDa	112 kDa	112 kDac	115 kDa	115 kDac	450 kDa	450 kDac	500 kDa	500 kDa	500 kDac	500 kDac	650 kDa	650 kDac	>700 kDa	>700 kDac
#	Protein annotation	Number	MW (kDa)	1	2	3	4	5	6	7	8	9	10	11	13	29	35	28	34	33	39	32	38	31	37	30	36	12	23	16	22	15	27	20	21	26	14	19	25	18	24	17
1	Lsp (X20 Rib; X1 MucBP); LPQTG cell wall anchor	Lr70580	404	3	4	13	31	1		1	18	87	11	2	231	70	31	18	14	0	0	23	14	4	4	0	0	255	73	36	16	4	3	18	13	24	11	16	26	24	0	0
2	Putative AAA ATPase (X27 DUF1542; X1 vWA); LPQTG cell wall anchor	Lr70770	396	19	7	1	0			24	232	0	4	1	30	6	5	16	15	0	1	67	44	8	7	6	2	34	5	5	10	6	8	34	60	64	47	47	26	22	2	0
3	MucBP protein (X16 MucBP); LPQTG cell wall anchor	Lr70581	474	0	0	0	0	0		0		0	0	0	18	0	0	8	8	0	0	54	35	38	40	6	6	9	4	4	4	2	2	10	18	16	18	13	66	55	5	5
4	Chromosome segregation peptidase; LPQTG cell wall anchor	Lr70714	94	6						5	1		4	14	46	8	5	19	19	0	0			3	3			161	44	38	49	24	0	0					0	0	0
5	Ftf; LPQTG cell wall anchor	Lr71010	87	2	0	3	2	1		1	1		0	3	90	24	11	5	6	0	0							138	15	8	1	1	0	0	0						0	0
6	Chromosome segregation ATPase; LPKTG cell wall anchor	Lr70697	223	51	26	11				8	8				32	5	5	6	6	0	0							11					0	0
7	Chromosome segregation ATPase (X1 Rib); LPQTG cell wall anchor	Lr70085	109	48	7	3	1	0	0	30	9		1	3	39	2	2	11	11									33	3	3	6	4					0				0	0
8	Chromosome segregation ATPase; LPQTG cell wall anchor	Lr70874	100	7	1	0		1		6	0		1	0	43	1	0	7	7	0	0							30			1	1		0
9	Serine-rich surface protein; LPQTG cell wall anchor	Lr70902	224		0	1	0	1		0	0		16	5														5					0	4	2	3	2	2	3	3	3	3
10	Chromosome segregation ATPase; LPQTG cell wall anchor	Lr70212	97			0	0			1	0	0	1	4	12	1	0	3	2		0							8	4	2	8	1
11	Putative amino acid ligase/surface protein (X4 MucBP; 26aa repeats); X3 YG motifs	Lr69836	191		0						0				16	3	2	7	8									21	2	2	7	5
12	Nucleoside transporter	Lr70588	44	6	6	10	8	1	0	4	8	4	5	7	0													0													0	0
13	ABC transporter; His/Glu/Gln/Arg/opine family	Lr69361	26	3	1	4	0	1		6	2	1	2	1														0
14	Hypothetical membrane protein	Lr71330	28	0	1	3	0	1	0	4	0	0	1	0														0
15	Phosphoketolase	Lr70247	91			1	0						0		3													1
16	Amino acid transporter	Lr69874	54	0		4	0	0		2	3		0	2														0
				a Cell surface extract data are combined from duplicate samples with different gel loadings
				b MW sizes indicate the region of the gel lane excised relative to the HiMark high MW marker
				c Samples were double-digested with trypsin and GluC
		Probability legend:		>95%
				80%-94%
				50%-79%
				20%-49%
				0%-19%
